# Supplementary material for: A Potential Molecular Inhibitor of the SARS-COV-2 Main Protease Obtained by Virtual Screening
Source: Research Square preprint supplement (doi:10.21203/rs.3.rs-2826336/v1), 2023-04-21
Supplement: Supplementary file 1 [file 21d74a7abc6258b472cd39a9.docx]

Article

A Potential Molecular Inhibitor of the SARS-COV-2 Main Protease Obtained by Virtual Screening

Nanxin Liu 1, Zeyu Yang 1, Yuying Liu 1, Xintao Dang 1, Qingqing Zhang 1, Jin Wang 1, Xueying Liu 2, Jie Zhang 1 and Xiaoyan Pan 1,*

1 School of Pharmacy, Health Science Center, Xi'an Jiaotong University, Xi’an, 710061, China.

2 School of Pharmacy, The Fourth Military Medical University, Xi'an, 710032, China.

***** Correspondence: panxy2016@xjtu.edu.cn.

**Table S1.** Docking Score of All Compounds

| Title | SMILE | docking binding energy(ΔG, kcal/mol) |
| --- | --- | --- |
| V1 |  | -6.626 |
| V2 |  | -6.472 |
| V3 |  | -6.52 |
| V4 |  | -6.527 |
| V5 |  | -6.36 |
| V6 |  | -6.86 |
| V7 |  | -6.711 |
| V8 |  | -6.221 |
| V9 |  | -6.475 |
| V10 |  | -6.533 |
| V11 |  | -6.466 |
| V12 |  | -7.192 |
| V13 |  | -6.733 |
| V14 |  | -6.682 |
| V15 |  | -6.136 |
| V16 |  | -6.321 |
| V17 |  | -6.407 |
| V18 |  | -6.411 |
| V19 |  | -6.101 |
| V20 |  | -6.529 |
| V21 |  | -6.763 |
| V22 |  | -6.061 |
| V23 |  | -6.659 |
| V24 |  | -5.908 |
| V25 |  | -5.956 |
| V26 |  | -5.842 |
| V27 |  | -6.12 |
| V28 |  | -5.487 |
| V29 |  | -6.303 |
| V30 |  | -6.415 |
| V31 |  | -6.799 |
| V32 |  | -5.602 |
| V33 |  | -6.088 |
| V34 |  | -6.715 |
| V35 |  | -6.282 |
| V36 |  | -6.126 |
| V37 |  | -6.401 |
| V38 |  | -5.925 |
| V39 |  | -6.62 |
| V40 |  | -6.268 |
| V41 |  | -5.188 |
| V42 |  | -5.813 |
| V43 |  | -6.381 |
| V44 |  | -6.525 |
| V45 |  | -6.403 |
| V46 |  | -5.05 |
| V47 |  | -6.01 |
| V48 |  | -5.521 |
| V49 |  | -6.328 |
| V50 |  | -5.535 |
| V51 |  | -6.039 |
| V52 |  | -5.586 |
| V53 |  | -6.355 |
| V54 |  | -6.813 |
| V55 |  | -6.767 |
| V56 |  | -6.645 |
| V57 |  | -5.978 |
| V58 |  | -7.013 |
| V59 |  | -6.951 |
| V60 |  | -7.261 |
| V61 |  | -6.346 |
| V62 |  | -6.572 |
| V63 |  | -6.43 |
| V64 |  | -6.551 |
| V65 |  | -6.611 |
| V66 |  | -6.883 |
| V67 |  | -6.629 |
| V68 |  | -5.99 |
| V69 |  | -5.648 |
| V70 |  | -7.299 |
| V71 |  | -6.066 |
| V72 |  | -6.833 |
| V73 |  | -6.759 |
| V74 |  | -7.225 |
| V75 |  | -7.331 |
| V76 |  | -6.335 |
| V77 |  | -5.902 |
| V78 |  | -6.866 |
| V79 |  | -6.627 |
| V80 |  | -6.066 |
| V81 |  | -6.061 |
| V82 |  | -5.21 |
| V83 |  | -6.68 |
| V84 |  | -6.903 |
| V85 |  | -5.975 |
| V86 |  | -7.085 |
| V87 |  | -6.971 |
| V88 |  | -4.961 |
| V89 |  | -6.948 |
| V90 |  | -6.195 |
| V91 |  | -6.571 |
| V92 |  | -6.089 |
| V93 |  | -5.944 |
| V94 |  | -6.336 |
| V95 |  | -6.179 |
| V96 |  | -6.921 |
| V97 |  | -7.138 |
| V98 |  | -6.929 |
| V99 |  | -6.541 |
| V100 |  | -6.713 |
| V101 |  | -5.911 |
| V102 |  | -5.655 |
| V103 |  | -7.535 |
| V104 |  | -6.66 |
| V105 |  | -6.812 |
| V106 |  | -6.927 |
| V107 |  | -6.807 |
| V108 |  | -5.975 |
| V109 |  | -7.567 |
| V110 |  | -6.331 |
| V111 |  | -7.195 |
| V112 |  | -7.29 |
| V113 |  | -5.688 |
| V114 |  | -6.728 |
| V115 |  | -6.622 |
| V116 |  | -6.331 |
| V117 |  | -5.895 |
| V118 |  | -6.412 |
| V119 |  | -5.765 |
| V120 |  | -7.081 |
| V121 |  | -5.925 |
| V122 |  | -7.095 |
| V123 |  | -6.219 |
| V124 |  | -6.607 |
| V125 |  | -6.991 |
| V126 |  | -6.89 |
| V127 |  | -6.773 |
| V128 |  | -7.264 |
| V129 |  | -6.636 |
| V130 |  | -6.44 |
| V131 |  | -7.876 |
| V132 |  | -6.415 |
| V133 |  | -8.379 |
| V134 |  | -5.713 |
| V135 |  | -6.087 |
| V136 |  | -6.662 |
| V137 |  | -6.378 |
| V138 |  | -6.75 |
| V139 |  | -7.422 |
| V140 |  | -6.773 |
| V141 |  | -6.33 |
| V142 |  | -6.301 |
| V143 |  | -6.433 |
| V144 |  | -7.195 |
| V145 |  | -6.482 |
| V146 |  | -6.017 |
| V147 |  | -7.364 |
| V148 |  | -6.25 |
| V149 |  | -6.896 |
| V150 |  | -7.145 |
| V151 |  | -6.441 |
| V152 |  | -6.778 |
| V153 |  | -6.788 |
| V154 |  | -7.26 |
| V155 |  | -7.113 |
| V156 |  | -6.984 |
| V157 |  | -6.881 |
| V158 |  | -6.892 |
| V159 |  | -7.091 |
| V160 |  |  |
| V161 |  | -6.514 |
| V162 |  | -6.545 |
| V163 |  | -7.052 |
| V164 |  | -6.587 |
| V165 |  | -7.051 |
| V166 |  | -6.978 |
| V167 |  | -6.702 |
| V168 |  | -7.182 |
| V169 |  | -6.611 |
| V170 |  | -7.085 |
| V171 |  | -6.902 |
| V172 |  | -7.403 |
| V173 |  | -7.138 |
| V174 |  | -7.369 |
| V175 |  | -7.538 |
| V176 |  | -6.275 |
| V177 |  | -6.861 |
| V178 |  | -6.171 |
| V179 |  | -5.036 |
| V180 |  | -6.406 |
| V181 |  | -5.335 |
| V182 |  | -5.516 |
| V183 |  | -6.283 |
| V184 |  | -5.509 |
| V185 |  | -6.401 |
| V186 |  | -6.067 |
| V187 |  | -6.328 |
| V188 |  | -5.094 |
| V189 |  | -6.027 |
| V190 |  | -6.42 |
| V191 |  | -5.786 |
| V192 |  | -6.034 |
| V193 |  | -5.887 |
| V194 |  | -6.209 |
| V195 |  | -5.696 |
| V196 |  | -5.185 |
| V197 |  | -5.434 |
| V198 |  | -6.823 |
| V199 |  | -5.635 |
| V200 |  | -5.655 |
| V201 |  | -5.182 |
| V202 |  | -6.075 |
| V203 |  | -6.661 |
| V204 |  | -7.89 |
| V205 |  | -7.501 |
| V206 |  | -6.213 |
| V207 |  | -6.222 |
| V208 |  | -6.951 |
| V209 |  | -6.811 |
| V210 |  | -6.676 |
| V211 |  | -6.714 |
| V212 |  | -7.688 |
| V213 |  | -6.946 |
| V214 |  | -5.958 |
| V215 |  | -7.032 |
| V216 |  | -6.946 |
| V217 |  | -6.482 |
| V218 |  | -5.841 |
| V219 |  | -7.212 |
| V220 |  | -6.013 |
| V221 |  | -6.943 |
| V222 |  | -7.305 |
| V223 |  | -6.69 |
| V224 |  | -6.764 |
| V225 |  | -7.068 |
| V226 |  | -7.141 |
| V227 |  | -6.403 |
| V228 |  | -8.122 |
| V229 |  | -7.509 |
| V230 |  | -7.314 |
| V231 |  | -7.372 |
| V232 |  | -6.088 |
| V233 |  | -6.277 |
| V234 |  | -6.263 |
| V235 |  | -6.649 |
| V236 |  | -6.902 |
| V237 |  | -6.847 |
| V238 |  | -7.134 |
| V239 |  | -6.542 |
| V240 |  | -7.211 |
| V241 |  | -7.108 |
| V242 |  | -6.218 |
| V243 |  | -7.68 |
| V244 |  | -6.494 |
| V245 |  | -7.401 |
| V246 |  | -6.602 |
| V247 |  | -8.538 |
| V248 |  | -7.565 |
| V249 |  | -6.568 |
| V250 |  | -6.449 |
| V251 |  | -5.414 |
| V252 |  | -7.416 |
| V253 |  | -8.832 |
| V254 |  | -7.286 |
| V255 |  | -5.04 |
| V256 |  | -6.19 |
| V257 |  | -7.37 |
| V258 |  | -3.553 |
| V259 |  | -5.516 |
| V260 |  | -6.287 |
| V261 |  | -6.367 |
| V262 |  | -5.971 |
| V263 |  | -4.862 |
| V264 |  | -5.369 |
| V265 |  | -5.701 |
| V266 |  | -5.966 |
| V267 |  | -5.793 |
| V268 |  | -5.227 |
| V269 |  | -5.781 |
| V270 |  | -5.137 |
| V271 |  | -6.034 |
| V272 |  | -6.007 |
| V273 |  | -6.396 |
| V274 |  | -5.773 |
| V275 |  | -5.466 |
| V276 |  | -6.569 |
| V277 |  | -4.427 |
| V278 |  | -5.387 |
| V279 |  | -4.871 |
| V280 |  | -4.957 |
| V281 |  | -5.4 |
| V282 |  | -7.481 |
| V283 |  | -7.532 |
| V284 |  | -6.727 |
| V285 |  | -6.488 |
| V286 |  | -7.432 |
| V287 |  | -6.09 |
| V288 |  | -6.442 |
| V289 |  | -6.649 |
| V290 |  | -6.502 |
| V291 |  | -8.071 |
| V292 |  | -6.936 |
| V293 |  | -7.205 |
| V294 |  | -6.207 |
| V295 |  | -6.849 |
| V296 |  | -5.938 |
| V297 |  | -6.48 |
| V298 |  | -6.864 |
| V299 |  | -6.747 |
| V300 |  | -6.622 |
| V301 |  | -6.43 |
| V302 |  | -5.789 |
| V303 |  | -7.458 |
| V304 |  | -7.878 |
| V305 |  | -6.156 |
| V306 |  | -7.335 |
| V307 |  | -6.666 |
| V308 |  | -6.237 |
| V309 |  | -6.923 |
| V310 |  | -6.808 |
| V311 |  | -6.514 |
| V312 |  | -6.785 |
| V313 |  | -6.472 |
| V314 |  | -6.415 |
| V315 |  | -6.398 |
| V316 |  | -6.937 |
| V317 |  | -6.556 |
| V318 |  | -5.716 |
| Nilotinib |  | -7.026 |

**Table S2.** The interaction between molecule and Mpro (based on the IFD docking results)

| **Compound** | **Molecular Interactions** | **Nature of Interactions** | **Distance (Å)** |
| --- | --- | --- | --- |
| V247 | Lig:N1 - Glu166:OE2 | Salt bridge | 3.81 |
| Asn142:HD21 - Lig:O4 | Hydrogen Bond | 2.10 |
| Lig:H15 - His164:O | Hydrogen Bond | 3.26 |
| Lig:H11 - Glu166:O | Hydrogen Bond | 1.96 |
| Lig:H36 - Glu166:O | Hydrogen Bond | 2.69 |
| Gln189:HE21 - Lig:O1 | Hydrogen Bond | 1.96 |
| Gln192:HE21 - Lig:N3 | Hydrogen Bond | 2.60 |
| V253 | Lig:N1 - Glu166:OE2 | Salt bridge | 3.17 |
| Lig:H19 - Leu141:O | Hydrogen Bond | 1.97 |
| Gly143:H - Lig:O4 | Hydrogen Bond | 2.15 |
| Ser144:H - Lig:O4 | Hydrogen Bond | 2.68 |
| Cys145:H - Lig:O4 | Hydrogen Bond | 2.17 |
| Lig:H15 - His164:O | Hydrogen Bond | 1.78 |
| Lig:H28 - Glu166:OE2 | Hydrogen Bond | 2.43 |
| Lig:H11 - Glu166:O | Hydrogen Bond | 2.62 |
| Gln189:HE21 - Lig:O2 | Hydrogen Bond | 2.91 |
| Gln192:H – Lig:N3 | Hydrogen Bond | 3.17 |
| Gln192:HE21 – Lig:N3 | Hydrogen Bond | 2.73 |
| His41 - Lig | Hydrophobic (Pi-Pi Stacking) | 5.47 |
| His41 - Lig | Hydrophobic (Pi-Pi Stacking) | 5.43 |
| V133 | Lig:N3 - Glu166:OE2 | Salt bridge | 3.23 |
| Gly143:H - Lig:O2 | Hydrogen Bond | 1.91 |
| Cys145:H – Lig:O2 | Hydrogen Bond | 3.33 |
| Lig:H28 - Glu166:OE2 | Hydrogen Bond | 2.36 |
| Lig:H24 – Glu166:O | Hydrogen Bond | 2.00 |
| Lig:H5 - Arg188:O | Hydrogen Bond | 2.71 |
| Gln189:HE21 - Lig:O1 | Hydrogen Bond | 1.98 |
| V109 | Lig:N1 – Glu166:OE2 | Salt bridge | 2.77 |
| His41:HD1 – Lig:O2 | Hydrogen Bond | 2.21 |
| Asn142:HD21 – Lig:O3 | Hydrogen Bond | 2.13 |
| Gly143:H – Lig:O3 | Hydrogen Bond | 2.12 |
| Lig:H11 – Glu166:O | Hydrogen Bond | 2.30 |
| Lig:H30 – Glu166:OE2 | Hydrogen Bond | 1.82 |
| Gln192:H – Lig:N3 | Hydrogen Bond | 2.04 |
| His41 - Lig | Hydrophobic (Pi-Pi Stacking) | 5.29 |
| V131 | Lig:H19 – His41:NE2 | Hydrogen Bond | 3.19 |
| Gly143:H – Lig:O3 | Hydrogen Bond | 1.82 |
| Ser144:H – Lig:O3 | Hydrogen Bond | 2.49 |
| Cys145:H – Lig:O3 | Hydrogen Bond | 2.65 |
| Lig:H14 – His164:O | Hydrogen Bond | 1.86 |
| Lig:H8 – Glu166:O | Hydrogen Bond | 2.09 |
| Gln192:HE21 – Lig:N2 | Hydrogen Bond | 3.14 |
| Gln192:H – Lig:N2 | Hydrogen Bond | 3.36 |
| Thr26:H – Lig:Cl1 | Halogen Bond | 2.40 |
| V254 | Gly143:H – Lig:O3 | Hydrogen Bond | 2.23 |
| Ser144:H – Lig:O3 | Hydrogen Bond | 2.29 |
| Cys145:H – Lig:O3 | Hydrogen Bond | 1.98 |
| Lig:H18 – His163:NE | Hydrogen Bond | 2.02 |
| Gln182:HE21 – Lig:O1 | Hydrogen Bond | 1.99 |
| Thr190:H – Lig:N2 | Hydrogen Bond | 2.87 |
| Thr26:H – Lig:Cl1 | Halogen Bond | 2.65 |
| V282 | Lig:H22 – Met49:O | Hydrogen Bond | 3.16 |
| Lig:H14 – Phe140:O | Hydrogen Bond | 2.27 |
| Asn142:HD22 – Lig:O1 | Hydrogen Bond | 2.42 |
| Lig:H11 – Asp187:O | Hydrogen Bond | 3.31 |
| Gln189:HE21 – Lig:O2 | Hydrogen Bond | 1.77 |
| Gln192:H – Lig:Cl1 | Halogen Bond | 2.27 |
| V139 | Cys44:HG – Lig:O3 | Hydrogen Bond | 2.97 |
| Lig:H12 – His164:O | Hydrogen Bond | 2.35 |
| Gln189:HE21 – Lig:O2 | Hydrogen Bond | 2.08 |
| Thr26:O – Lig:Cl1 | Halogen Bond | 3.32 |
| Thr26:H – Lig:Cl1 | Halogen Bond | 3.48 |
| V231 | Lig:H23 – His164:O | Hydrogen Bond | 3.36 |
| Glu166:H – Lig:O1 | Hydrogen Bond | 2.59 |
| Gln189:HE21 – Lig:O3 | Hydrogen Bond | 1.87 |
| Lig:H7 – Gln192:O | Hydrogen Bond | 2.06 |
| V128 | Thr26:H – Lig:O2 | Hydrogen Bond | 2.14 |
| Gly143:H- Lig:N3 | Hydrogen Bond | 2.06 |
| Lig:H19 – Glu166:O | Hydrogen Bond | 1.60 |
| Glu166:H – Lig:O1 | Hydrogen Bond | 1.87 |
| Lig:H5 – Gln189:OE1 | Hydrogen Bond | 1.87 |
| V160 | Thr26:H – Lig:O2 | Hydrogen Bond | 2.23 |
| Gly143:H – Lig:O2 | Hydrogen Bond | 1.85 |
| Cys145:H – Lig:O1 | Hydrogen Bond | 3.14 |
| Lig:H4 – Glu166:O | Hydrogen Bond | 2.10 |
| V163 | Thr26:H – Lig:O2 | Hydrogen Bond | 2.27 |
| Gly143:H – Lig:O1 | Hydrogen Bond | 1.79 |
| Cys145:H – Lig:O1 | Hydrogen Bond | 3.02 |
| V174 | Thr26:H – Lig:O2 | Hydrogen Bond | 2.89 |
| His41:HD1 – Lig:N3 | Hydrogen Bond | 2.13 |
| Gly143:H – Lig:O1 | Hydrogen Bond | 1.99 |
| Cys145:H – Lig:O1 | Hydrogen Bond | 3.12 |
| Gln192:H – Lig:Cl2 | Halogen Bond | 1.98 |
| Gln192:O – Lig:Cl2 | Halogen Bond | 3.37 |
| His41 - Lig | Hydrophobic (Pi-Pi Stacking) | 4.11 |
| V243 | Asn142:HD21 - Lig:O3 | Hydrogen Bond | 1.91 |
| Gly143:H - Lig:O4 | Hydrogen Bond | 2.14 |
| Glu166:H - Lig:O1 | Hydrogen Bond | 2.14 |
| Lig:H1 - Arg188:O | Hydrogen Bond | 2.31 |
| Lig:H24 - Thr26:O | Hydrogen Bond | 2.02 |
| His41 - Lig | Hydrophobic (Pi-Pi Stacking) | 4.06 |
| V229 | Lig:H23 – His:164 | Hydrogen Bond | 3.18 |
| Glu166:H – Lig:O1 | Hydrogen Bond | 2.92 |
| Gln189:HE21 – Lig:O4 | Hydrogen Bond | 1.74 |
| Gln192:H – Lig:N2 | Hydrogen Bond | 2.41 |
| V204 | Thr26:H – Lig:O2 | Hydrogen Bond | 1.91 |
| Gly143:H – Lig:O1 | Hydrogen Bond | 1.92 |
| Cys145:H – Lig:O1 | Hydrogen Bond | 2.66 |
| His164:O – Lig:H2 | Hydrogen Bond | 2.39 |
| Lig:H3 – Arg188:O | Hydrogen Bond | 2.03 |
| Thr24:HG1 – Lig:Cl1 | Halogen Bond | 3.31 |
| Thr45:H – Lig:Cl2 | Halogen Bond | 2.22 |
| Thr45:OG1 – Lig:Cl2 | Halogen Bond | 3.09 |
| V291 | Lig:N2 - Glu166:OE2 | Salt bridge | 4.88 |
| Lig:H14 - Thr26:O | Hydrogen Bond | 1.94 |
| Thr26:H – Lig:N7 | Hydrogen Bond | 2.92 |
| Lig:H12 - His41:O | Hydrogen Bond | 2.24 |
| Lig:H19 - Asn142:OD1 | Hydrogen Bond | 2.21 |
| Asn142:H - Lig:O1 | Hydrogen Bond | 2.62 |
| Gly143:H - Lig:N5 | Hydrogen Bond | 2.13 |
| Cys145:H – Lig:N5 | Hydrogen Bond | 3.00 |
| Lig:H2 - Glu166:OE1 | Hydrogen Bond | 1.89 |
| Lig:H2 - Glu166:OE2 | Hydrogen Bond | 3.07 |
| His41 – Lig | Hydrophobic (Pi-Pi Stacking) | 4.40 |
| His41 – Lig | Hydrophobic (Pi-Pi Stacking) | 4.58 |
| His163 - Lig | Hydrophobic (Pi-Pi Stacking) | 5.26 |
| V228 | Lig:H1 - His41:NE2 | Hydrogen Bond | 2.63 |
| Asn142:H - Lig:O2 | Hydrogen Bond | 2.57 |
| Lig:H10 - Asn142:OD1 | Hydrogen Bond | 1.98 |
| Lig:H1 - His164:O | Hydrogen Bond | 3.10 |
| Lig:H21 - Glu166:OE1 | Hydrogen Bond | 1.68 |
| His172:HE2 – Lig:O3 | Hydrogen Bond | 3.14 |
| Gln189:HE21 - Lig:O1 | Hydrogen Bond | 1.91 |
| V170 | Thr26:H – Lig:O2 | Hydrogen Bond | 1.94 |
| Gly143:H – Lig:O1 | Hydrogen Bond | 1.97 |
| Cys145:H – Lig:O1 | Hydrogen Bond | 2.88 |
| Lig:H12 – Glu166:O | Hydrogen Bond | 2.32 |
| Thr24:HG1 – Lig:Cl1 | Hydrogen Bond | 3.21 |
| His41 - Lig | Hydrophobic (Pi-Pi Stacking) | 5.36 |
| V75 | Thr26:H – Lig:O2 | Hydrogen Bond | 1,99 |
| Gly143:H – Lig:O3 | Hydrogen Bond | 1.95 |
| Cys145:H – Lig:O3 | Hydrogen Bond | 2.53 |
| Lig:H15 – Glu166:O | Hydrogen Bond | 1.99 |
| Gln189:HE21 – Lig:O4 | Hydrogen Bond | 1.90 |
| His41 - Lig | Hydrophobic (Pi-Pi Stacking) | 5.41 |
| V120 | Asn142:HD21 – Lig:O1 | Hydrogen Bond | 2.20 |
| Gly143:H – Lig:O1 | Hydrogen Bond | 2.04 |
| Cys145:HG – Lig:N4 | Hydrogen Bond | 2.50 |
| Lig:H9 – Glu166:O | Hydrogen Bond | 2.09 |
| Lig:H14 – Glu166:O | Hydrogen Bond | 1.97 |
| Gln192:HE21 – Lig:O2 | Hydrogen Bond | 2.00 |
| His41 - Lig | Hydrophobic (Pi-Pi Stacking) | 4.21 |
| V245 | Thr25:HG1 – Lig:O1 | Hydrogen Bond | 1.95 |
| Thr26:H – Lig:O1 | Hydrogen Bond | 1.93 |
| Gly143:H – Lig:N2 | Hydrogen Bond | 1.99 |
| Cys145:H – Lig:N2 | Hydrogen Bond | 3.24 |
| Glu166:H – Lig:O3 | Hydrogen Bond | 3.28 |
| His41 - Lig | Hydrophobic (Pi-Pi Stacking) | 5.12 |
| V226 | His41:HD1 – Lig:O1 | Hydrogen Bond | 1.79 |
| Asn142:HD21 – Lig:N2 | Hydrogen Bond | 2.20 |
| Lig:H25 – Glu166:O | Hydrogen Bond | 2.25 |
| Gln189:HE21 – Lig:O3 | Hydrogen Bond | 2.07 |
| His41 - Lig | Hydrophobic (Pi-Pi Stacking) | 5.26 |
| V252 | Lig:H17 - Leu141:O | Hydrogen Bond | 2.17 |
| Asn142:HD21 - Lig:O1 | Hydrogen Bond | 2.08 |
| Gly143:H - Lig:O1 | Hydrogen Bond | 2.07 |
| Gly143:H - Lig:O2 | Hydrogen Bond | 2.33 |
| Cys145:H - Lig:O2 | Hydrogen Bond | 2.40 |
| Lig:H9 - His164:O | Hydrogen Bond | 1.99 |
| Gln189:HE21 - Lig:O3 | Hydrogen Bond | 2.85 |
| Gln192:H - Lig:O4 | Hydrogen Bond | 1.95 |
| V154 | Thr26:H – Lig:O2 | Hydrogen Bond | 2.25 |
| Gly143:H – Lig:O1 | Hydrogen Bond | 1.74 |
| Cys145:H – Lig:O1 | Hydrogen Bond | 2.99 |
| Gln192:H – Lig:Br1 | Halogen Bond | 2.34 |
| His41 – Lig | Hydrophobic (Pi-Pi Stacking) | 4.28 |
| V304 | Lig:N1 - Glu166:OE2 | Salt bridge | 4.49 |
| Lig:H7 – Thr25:OG1 | Hydrogen Bond | 2.19 |
| Ser144:HG – Lig:N3 | Hydrogen Bond | 2.53 |
| Ser144:H – Lig:N4 | Hydrogen Bond | 2.93 |
| Cys145:H – Lig:N4 | Hydrogen Bond | 2.89 |
| Glu166:H – Lig:O1 | Hydrogen Bond | 1.83 |
| Lig:H2 – Glu166:OE1 | Hydrogen Bond | 2.01 |
| His41 – Lig | Hydrophobic (Pi-Pi Stacking) | 4.98 |
| His41 – Lig | Hydrophobic (Pi-Pi Stacking) | 5.17 |
| His41 – Lig | Hydrophobic (Pi-Pi Stacking) | 5.37 |
| V172 | Thr26:H – Lig:O2 | Hydrogen Bond | 1.90 |
| Lig:H4 – Gln189:OE1 | Hydrogen Bond | 1.85 |
| Gly143:H – Lig:O1 | Hydrogen Bond | 2.07 |
| Ser144:H – Lig:O1 | Hydrogen Bond | 2.32 |
| Cys145:H – Lig:O1 | Hydrogen Bond | 2.34 |
| V97 | His41:HD1 – Lig:O2 | Hydrogen Bond | 1.84 |
| Thr26:H – Lig:O3 | Hydrogen Bond | 2.06 |
| Glu166:H – Lig:N2 | Hydrogen Bond | 2.15 |
| Lig:H1 – Glu166:O | Hydrogen Bond | 2.32 |
| Gln189:HE21 – Lig:O1 | Hydrogen Bond | 1.84 |
| His41 – Lig | Hydrophobic (Pi-Pi Stacking) | 4.92 |
| V111 | Thr26:H – Lig:O2 | Hydrogen Bond | 2.07 |
| Lig:H6 – His41:NE2 | Hydrogen Bond | 2.58 |
| Asn142:HD21 – Lig:O1 | Hydrogen Bond | 2.11 |
| Gly143:H – Lig:O1 | Hydrogen Bond | 1.91 |
| Lig:H2 – His164:O | Hydrogen Bond | 2.86 |
| Lig:H3 – Val186:O | Hydrogen Bond | 3.44 |
| Arg188:O – Lig:H3 | Hydrogen Bond | 2.10 |
| Ser46:H – Lig:Br1 | Halogen Bond | 2.71 |
| V238 | His41:HD1 – Lig:O2 | Hydrogen Bond | 2.02 |
| Asn142:HD21 – Lig:O3 | Hydrogen Bond | 1.98 |
| Gly143:H – Lig:O3 | Hydrogen Bond | 2.26 |
| Gln192:HE21 – Lig:N2 | Hydrogen Bond | 3.15 |
| His41 – Lig | Hydrophobic (Pi-Pi Stacking) | 4.73 |
| V60 | Thr26:H – Lig:O3 | Hydrogen Bond | 2.15 |
| Gly143:H – Lig:O2 | Hydrogen Bond | 2.00 |
| Cys145:H – Lig:O2 | Hydrogen Bond | 2.96 |
| His41:HD1 – Lig:N3 | Hydrogen Bond | 1.96 |
| Lig:H6 – Arg188:O | Hydrogen Bond | 2.76 |
| His41 – Lig | Hydrophobic (Pi-Pi Stacking) | 4.17 |
| V103 | Thr24:O – Lig:H8 | Hydrogen Bond | 2.19 |
| Ser46:H – Lig:N2 | Hydrogen Bond | 2.37 |
| Gly143:H – Lig:O2 | Hydrogen Bond | 1.74 |
| Cys145:H – Lig:O2 | Hydrogen Bond | 3.37 |
| Glu166:H – Lig:O3 | Hydrogen Bond | 1.85 |
| Nilotinib | Asn142:HD22 - Lig:O1 | Hydrogen Bond | 2.56 |
| Asn142:HD21 - Lig:N6 | Hydrogen Bond | 2.33 |
| Cys145:HG - Lig:N5 | Hydrogen Bond | 2.48 |
| Lig:H16 - His164:O | Hydrogen Bond | 2.58 |
| Lig:H9 - Glu166:OE2 | Hydrogen Bond | 1.96 |
| Gln189:HE21 – Lig:N6 | Hydrogen Bond | 2.01 |
| Gln189:HE22 - Lig:O1 | Hydrogen Bond | 2.06 |


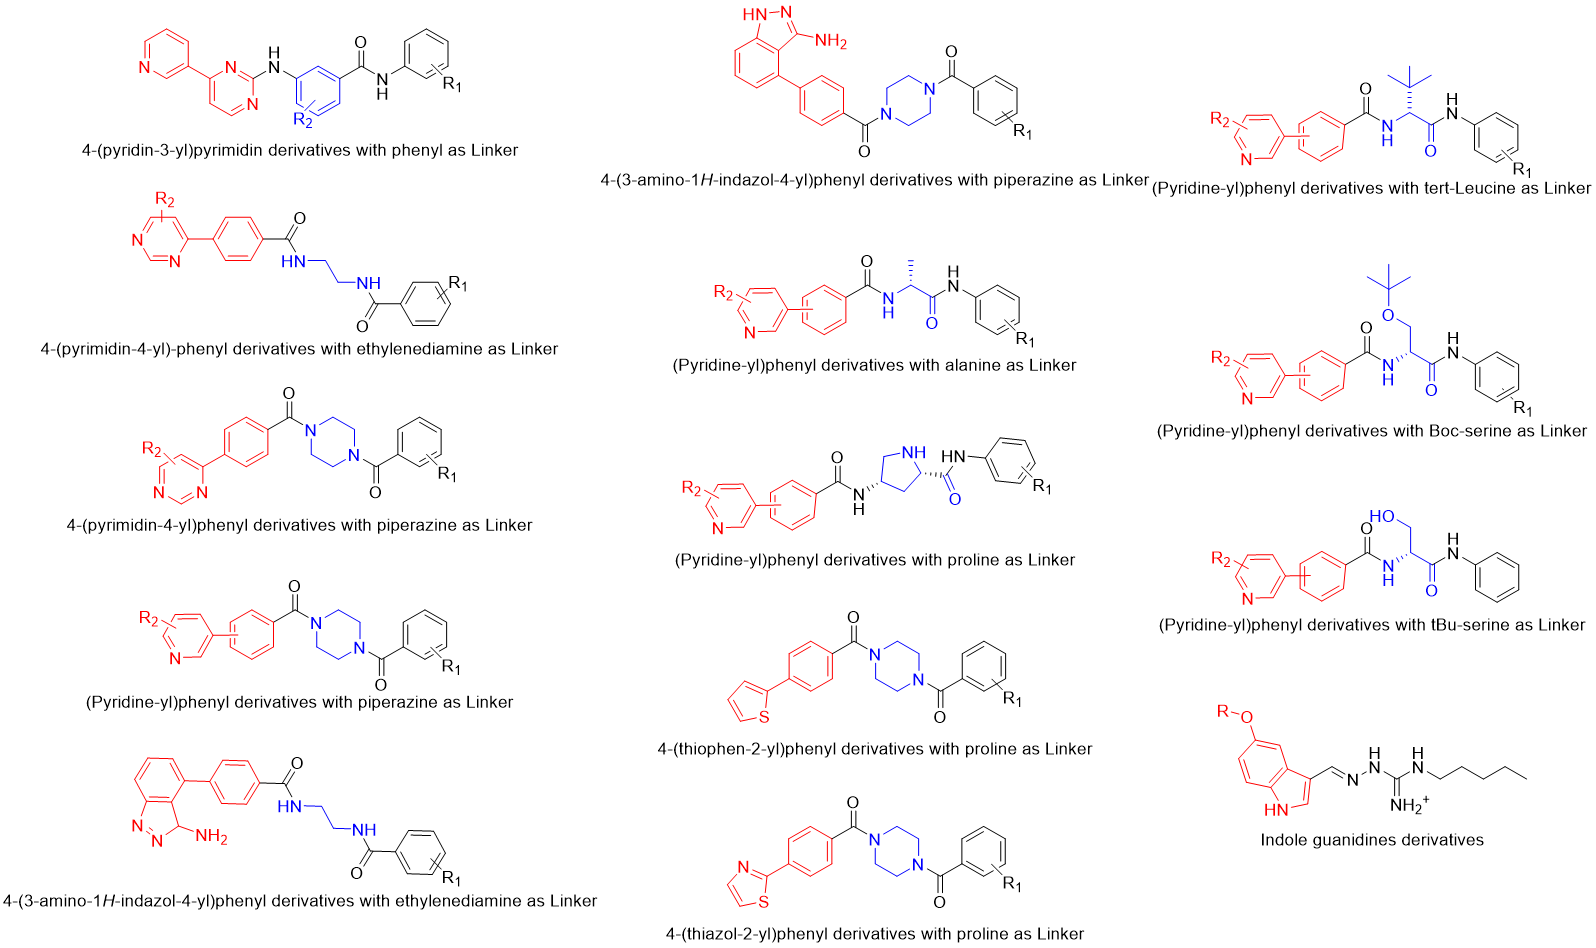


Figure S1. Structure types of all compounds.


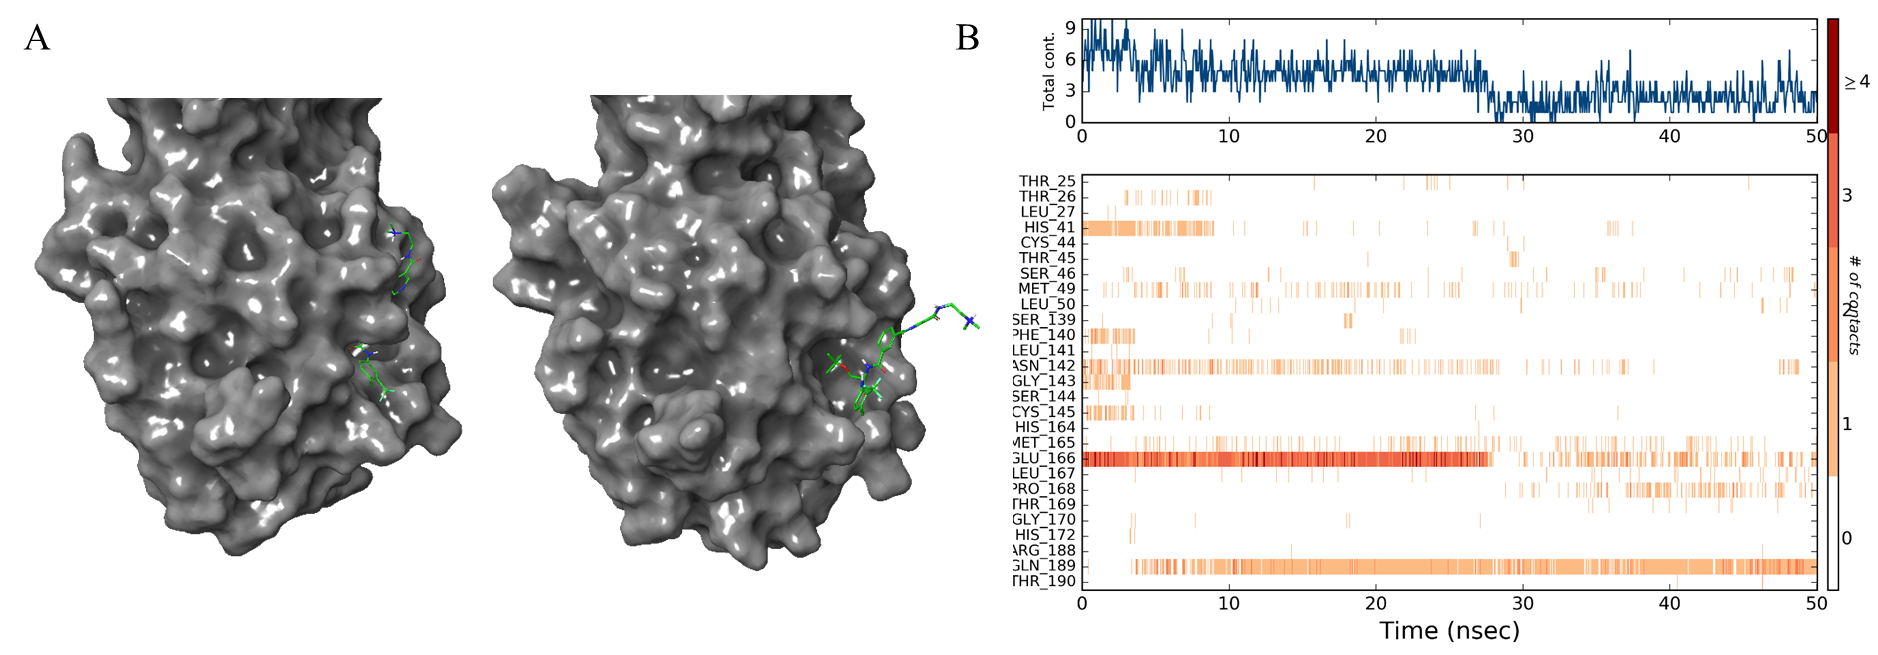


Figure S2. (A) Spatial structure of V247-Mpro complex at different times during dynamic simulation. At 1ns, the molecule binds closely to the protein (left); at 28ns, N-(2-dimethylamino)ethyl)nicotinamide of ligand structure has separated from the protein surface (right). (B) The interaction between V247 and the residues of the Mpro during 20 ns. Top panel shows the total number of specific contacts the protein makes with the ligand over the course of the trajectory, and bottom panel shows which residues interact with the ligand in each trajectory frame.


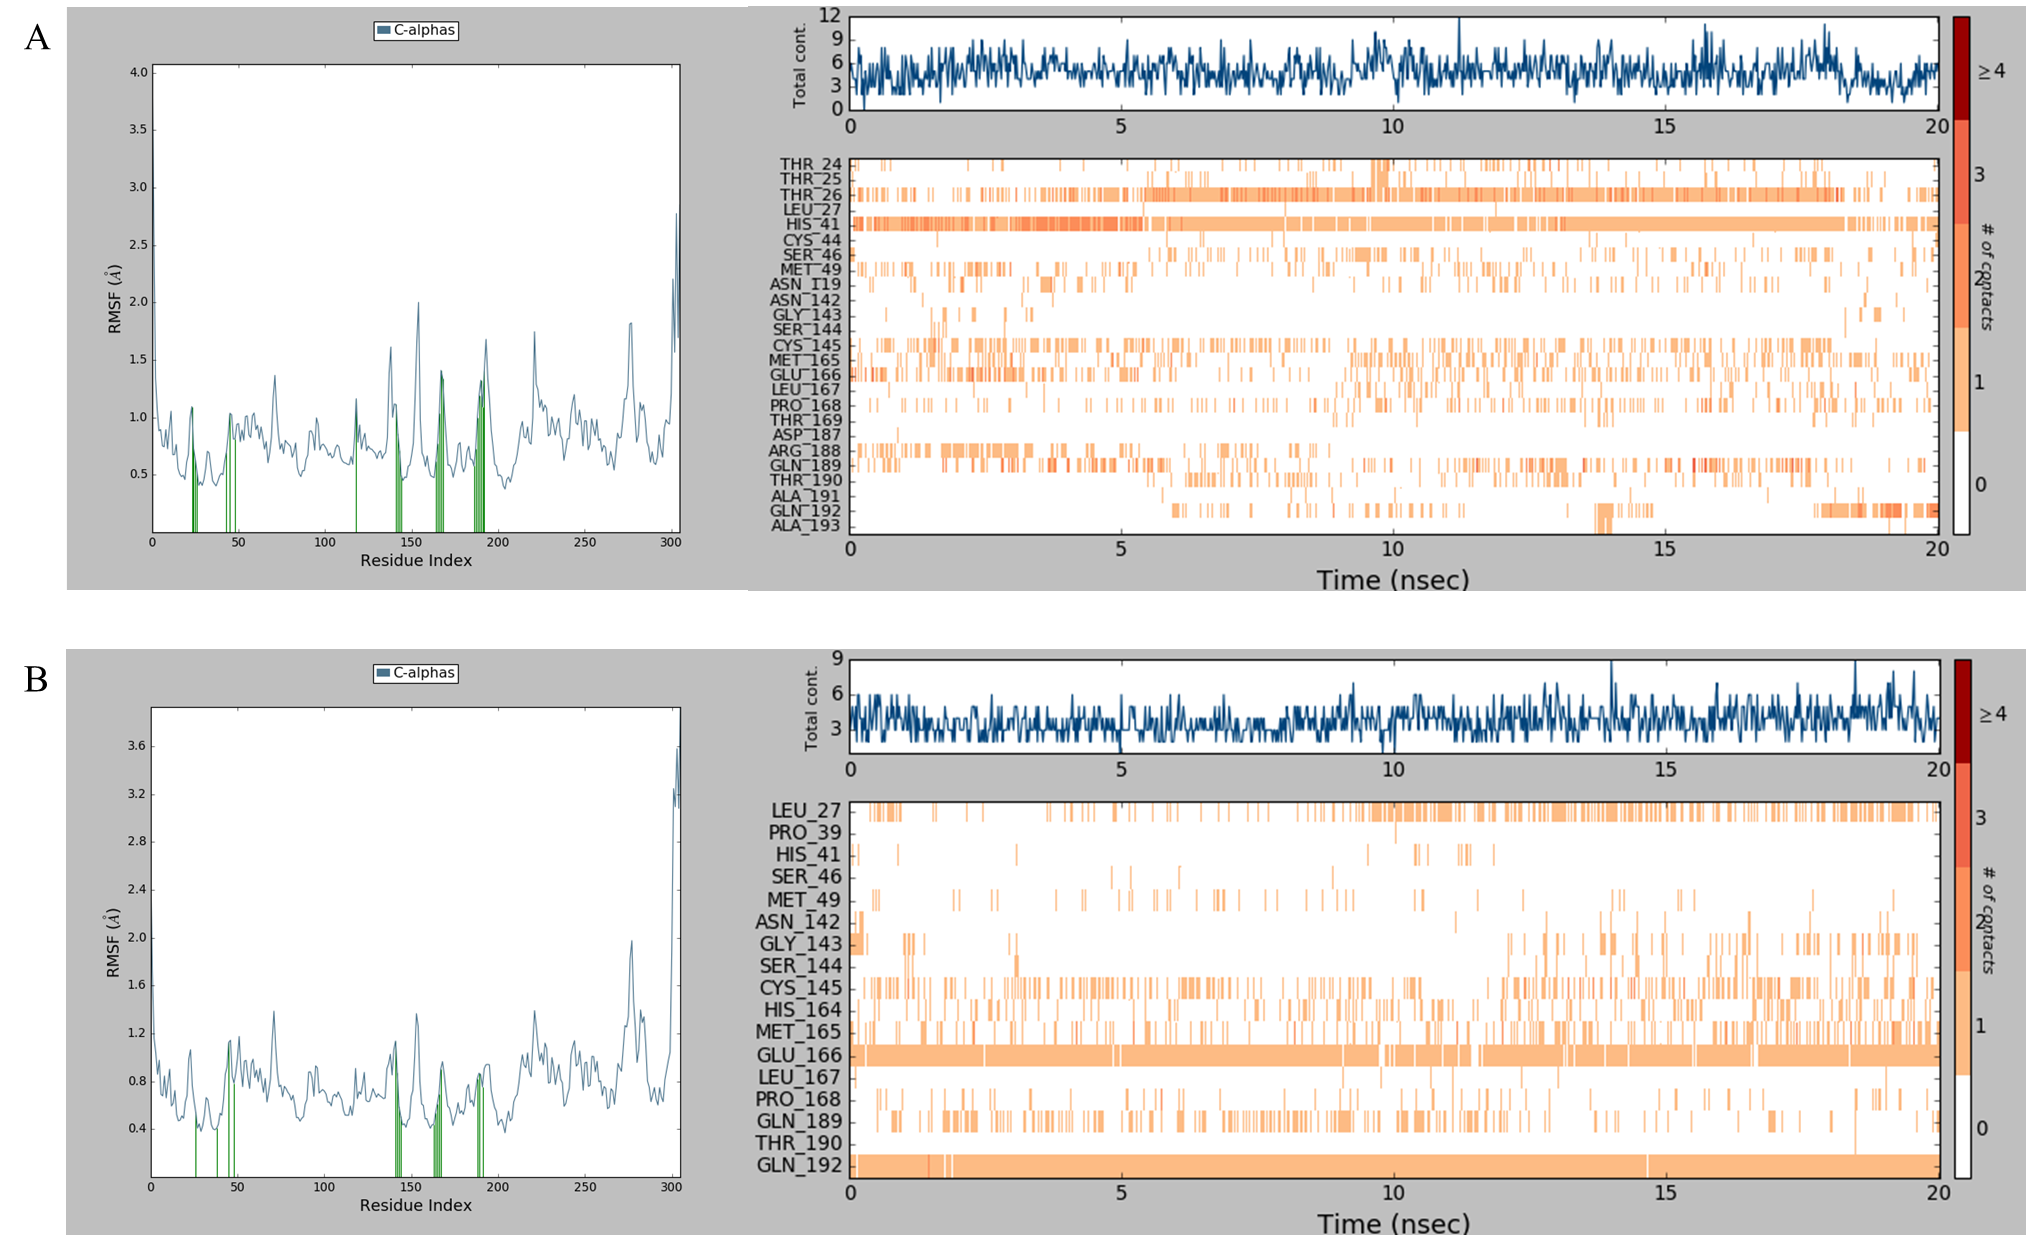


Figure S3. Protein RMSF plot (left) and Protein-Ligand Contacts (right) of V75-Mpro complex (A) and V97-Mpro complex (B)


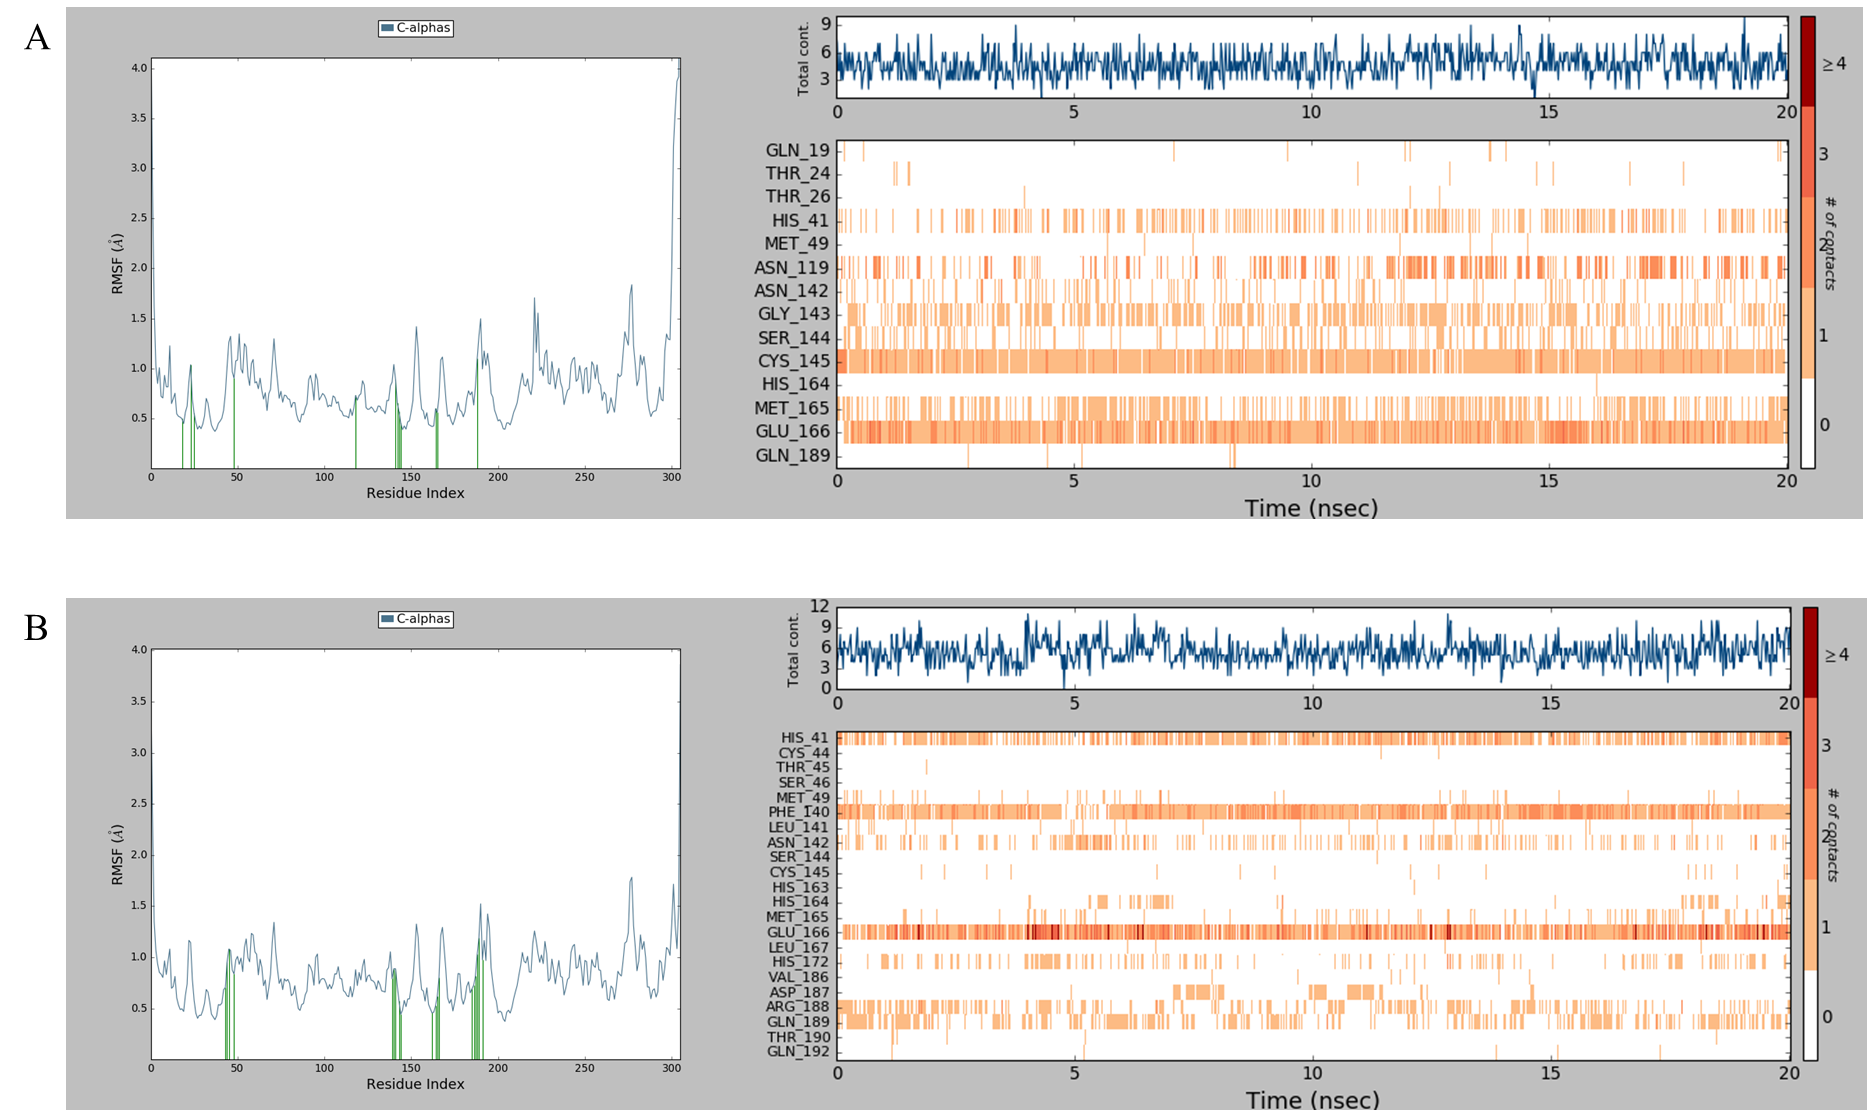


Figure S4. Protein RMSF plot (left) and Protein-Ligand Contacts (right) of V111-Mpro complex (A) and V139-Mpro complex (B)


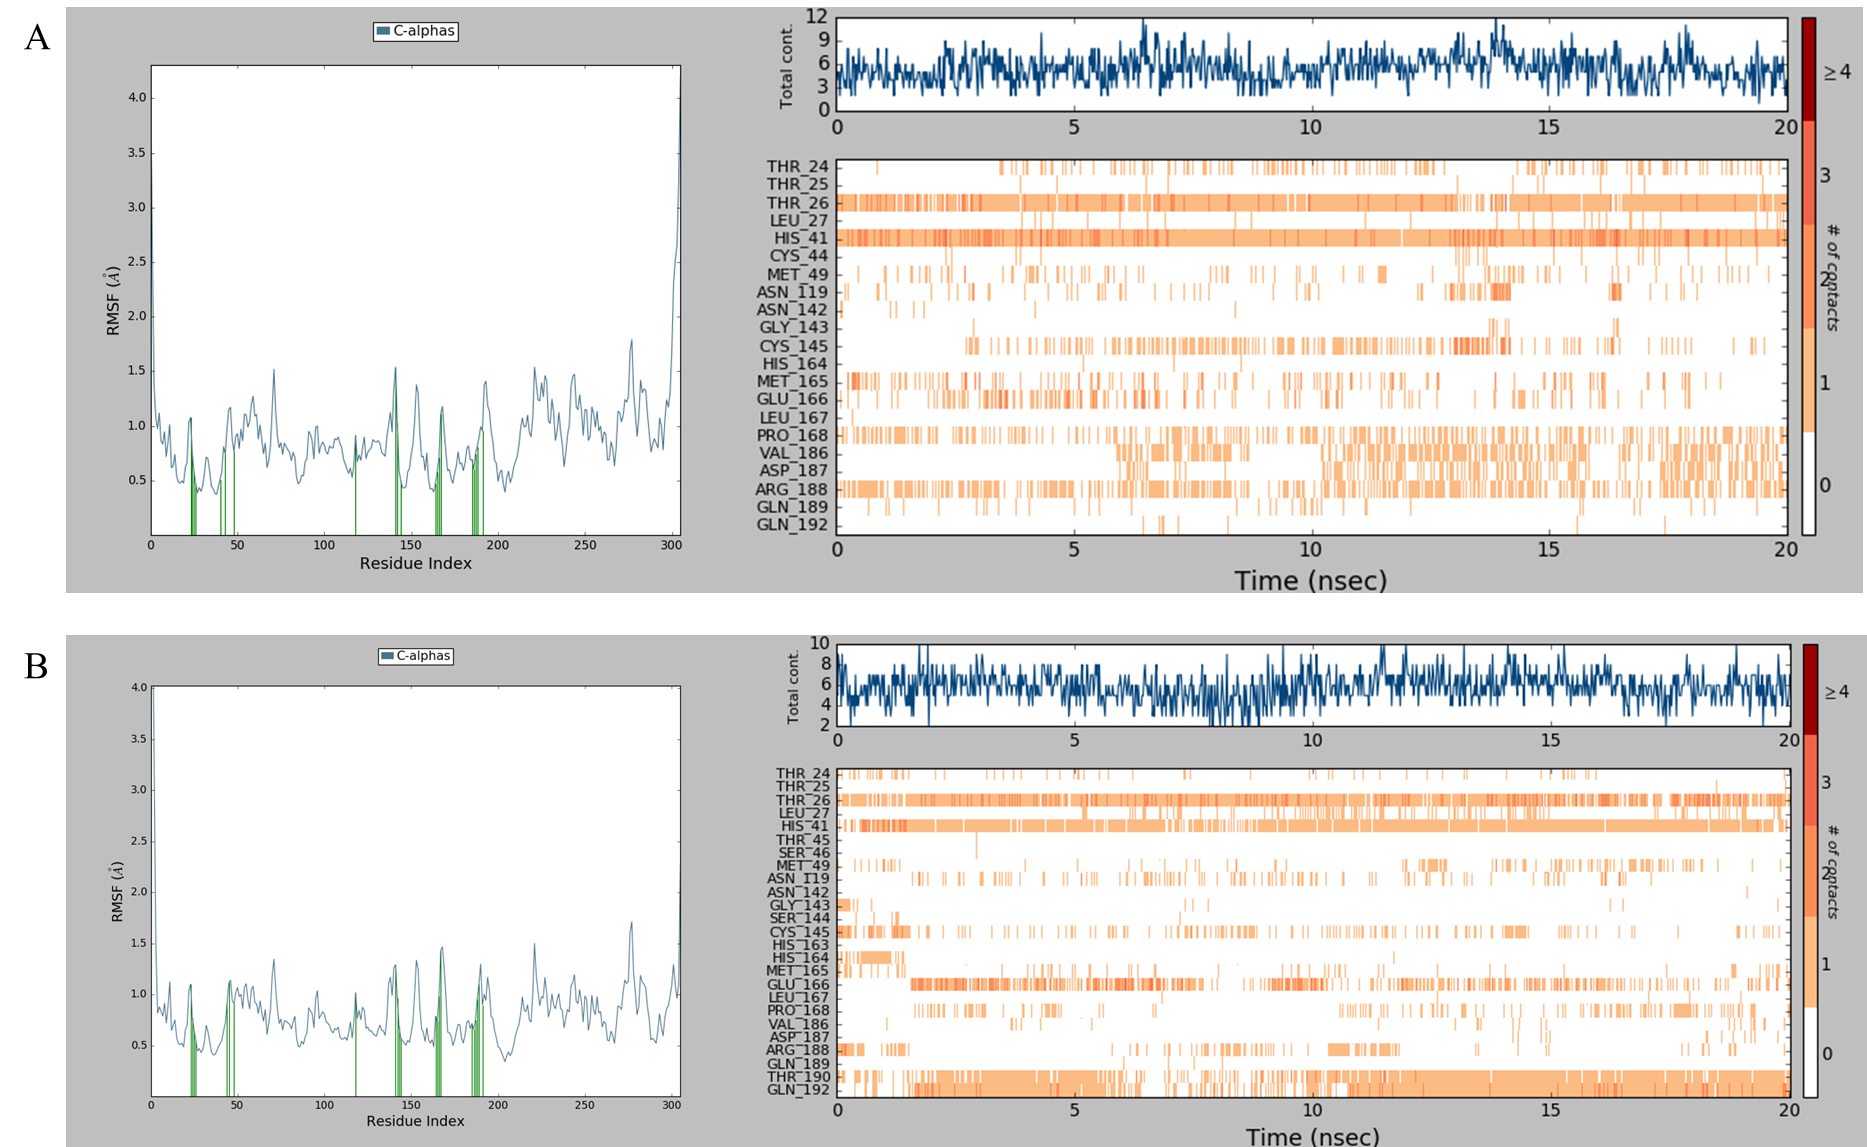


Figure S5 Protein RMSF plot (left) and Protein-Ligand Contacts (right) of V159-Mpro complex (A) and V205-Mpro complex (B)


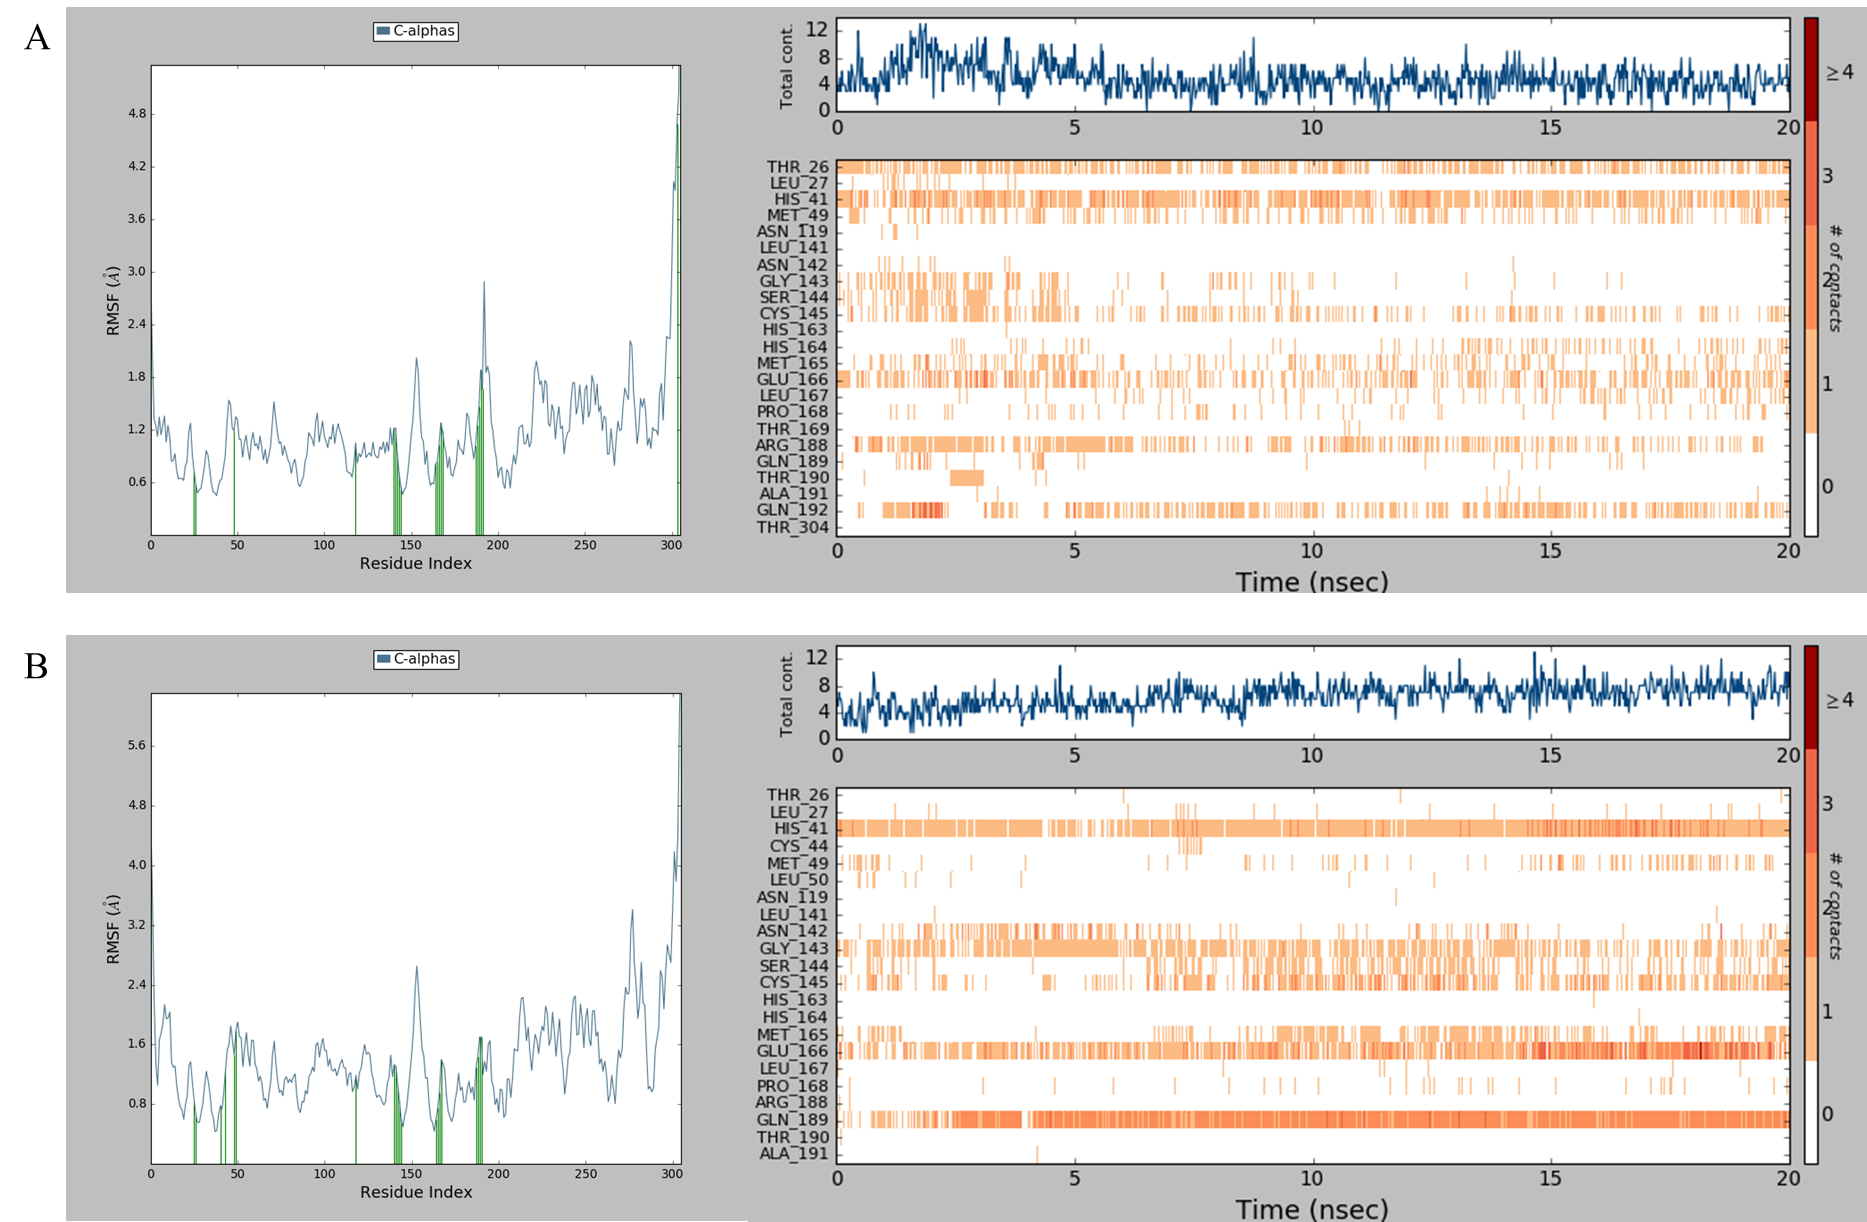


Figure S6. Protein RMSF plot (left) and Protein-Ligand Contacts (right) of V222-Mpro complex (A) and V226-Mpro complex (B)


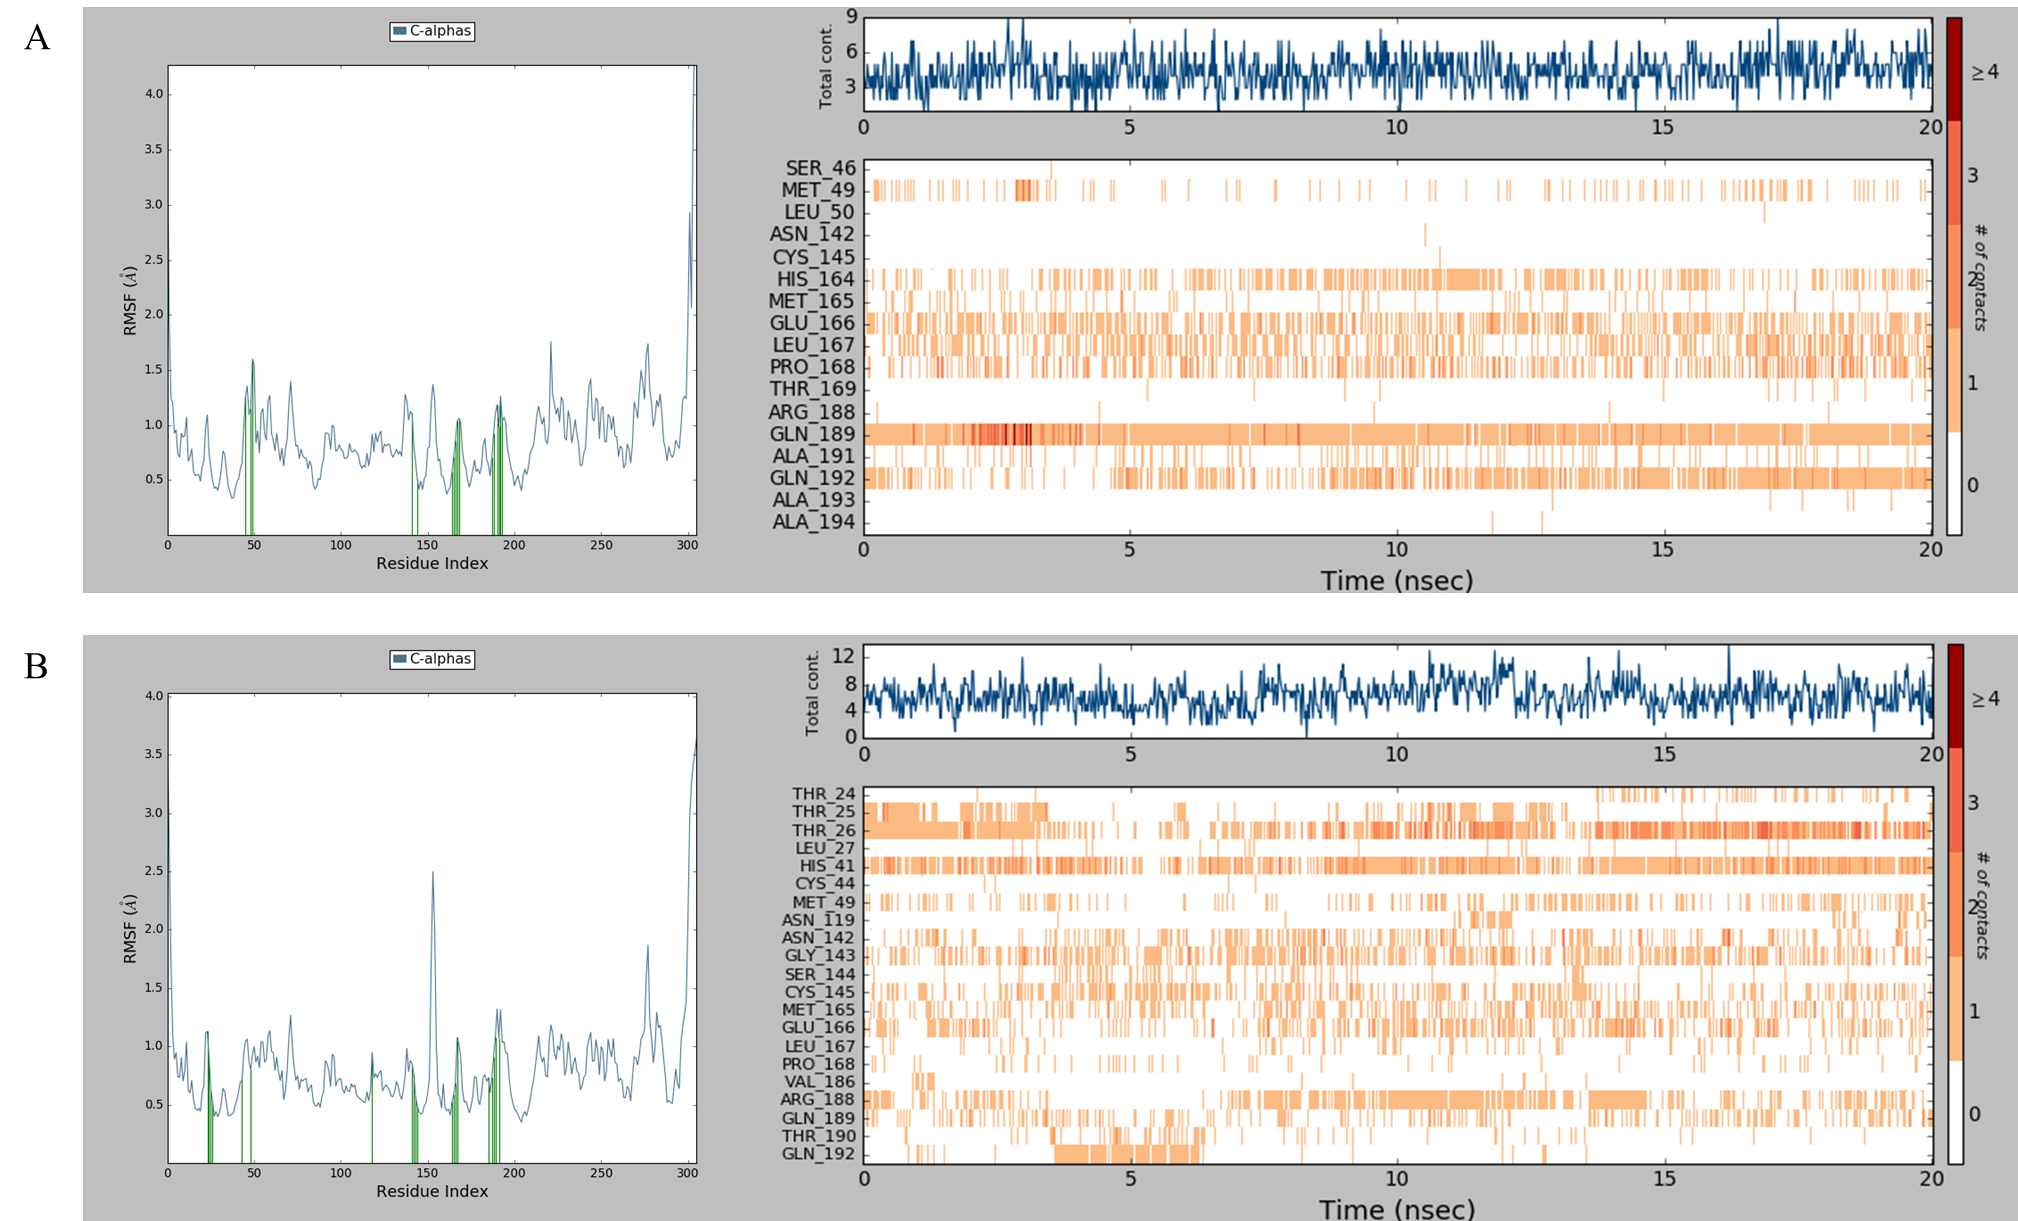


Figure S7. Protein RMSF plot (left) and Protein-Ligand Contacts (right) of V231-Mpro complex (A) and V243-Mpro complex (B)


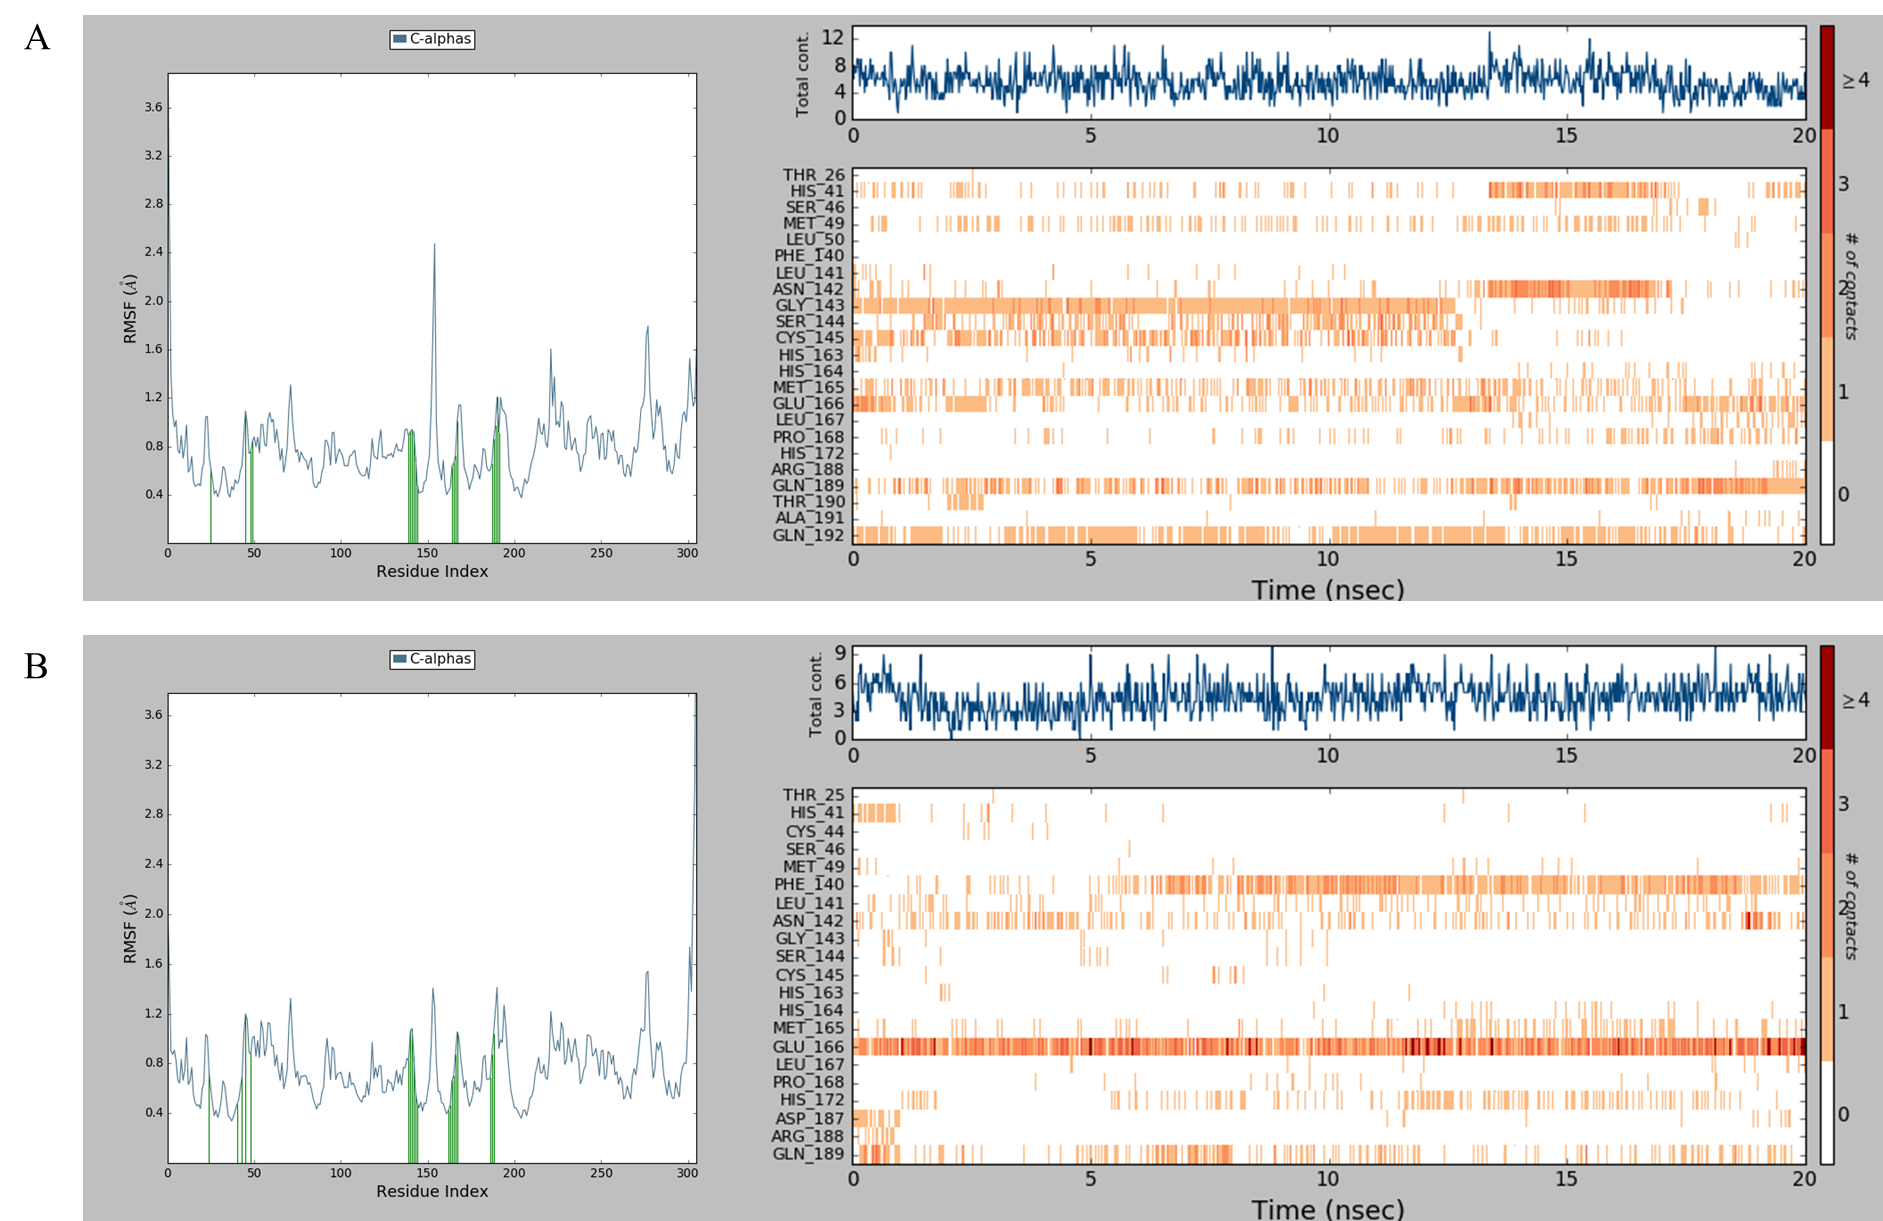


Figure S8. Protein RMSF plot (left) and Protein-Ligand Contacts (right) of V254-Mpro complex (A) and V282-Mpro complex (B)


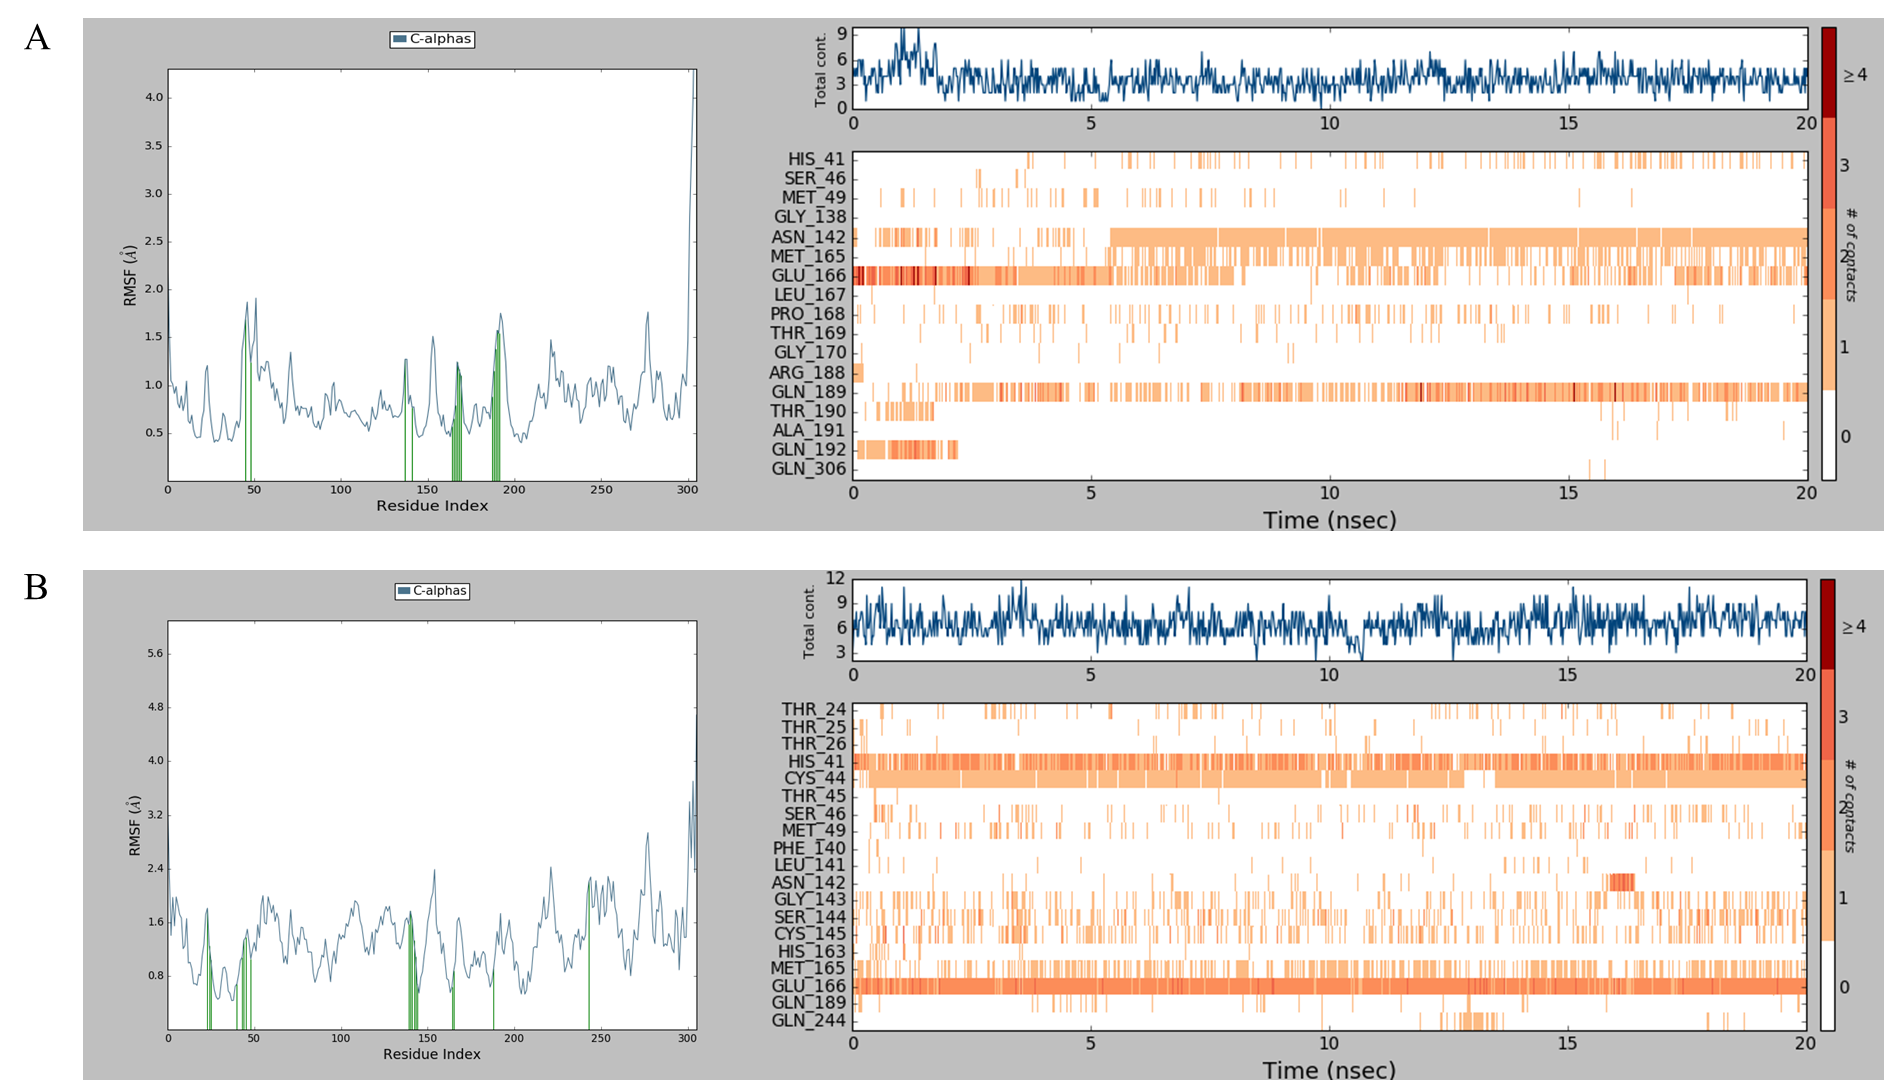


Figure S9. Protein RMSF plot (left) and Protein-Ligand Contacts (right) of V291-Mpro complex (A) and V304-Mpro complex (B)
